# Supplementary figures and images for: Genome-Wide Identification of the MYB and bHLH Families in Carnations and Expression Analysis at Different Floral Development Stages
Source: MDPI journal article supplement (doi:10.3390/ijms24119499), 2023-05-30

motif 1

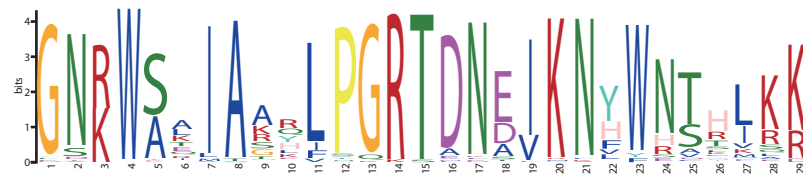

motif 2

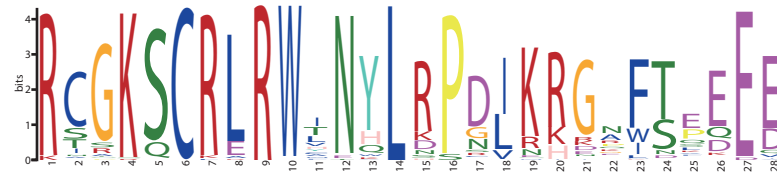

motif 3

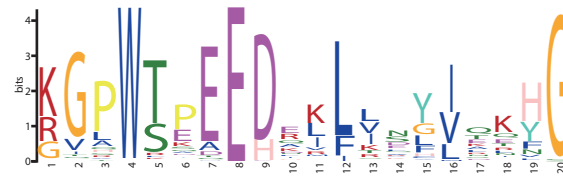

motif 4

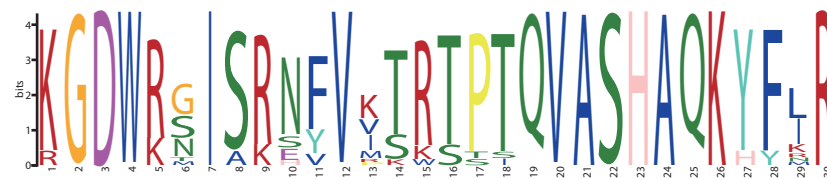

motif 5

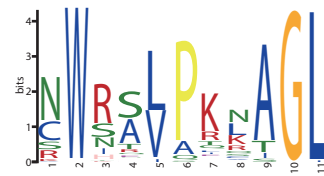

motif 6

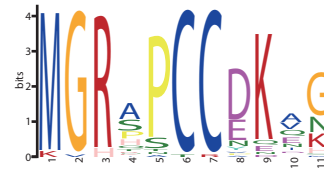

motif 7

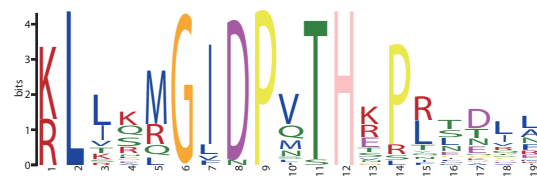

motif 8

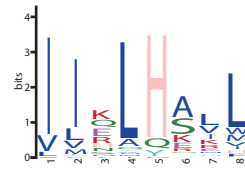

motif 9

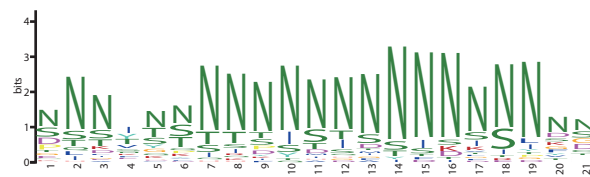

motif 10

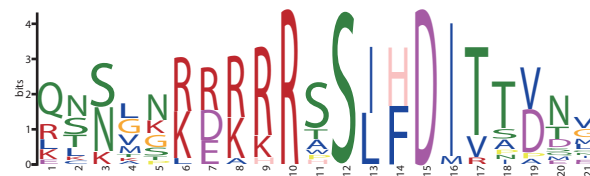

Supplement: s1 [file s1]

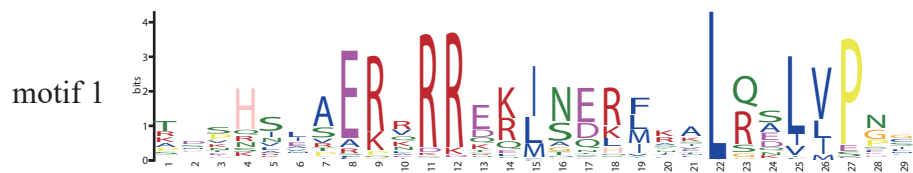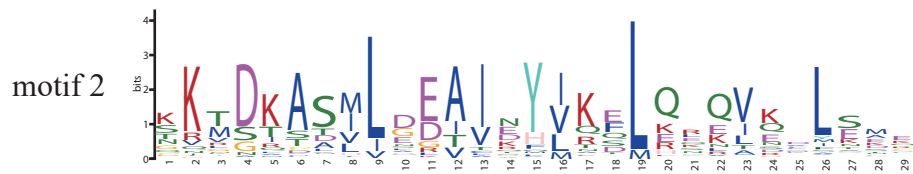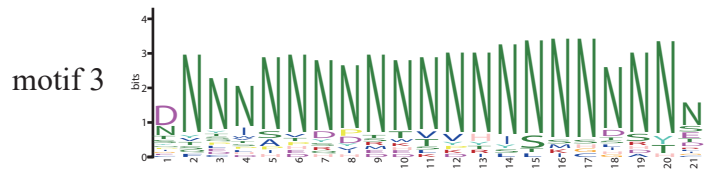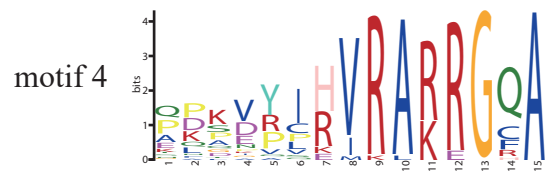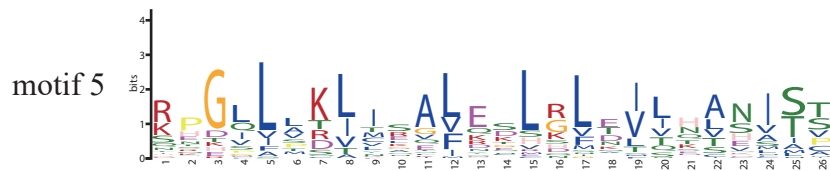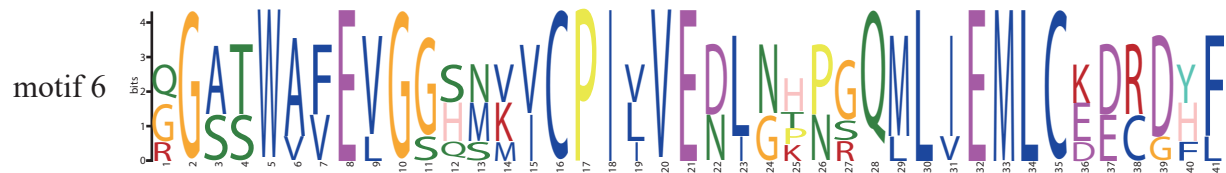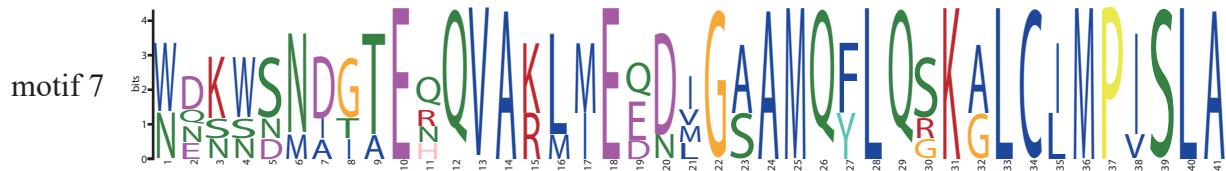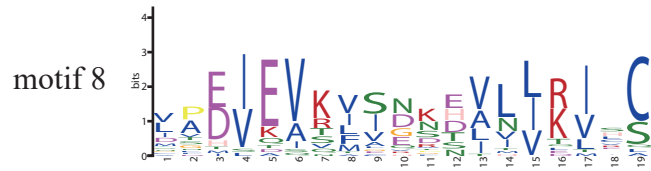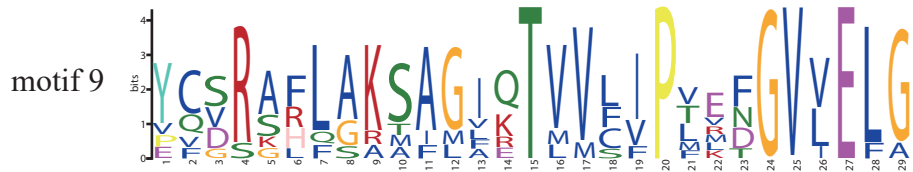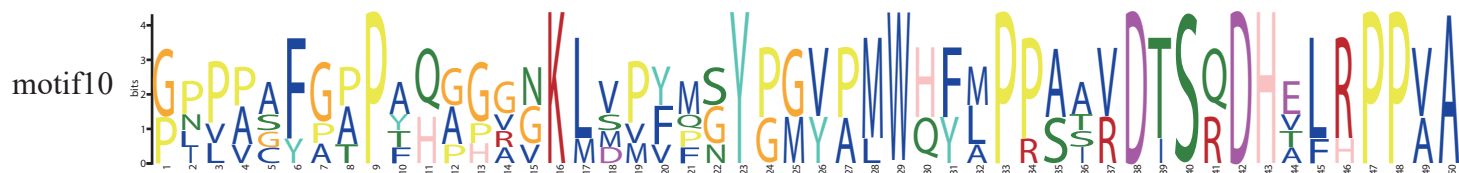

Supplement: s1 [file s1]
